# Supplementary material
Source: PubMed Central journal article supplement (PMC7318372)
Supplement: 13287_2020_1695_MOESM1_ESM.pdf [file 13287_2020_1695_MOESM1_ESM.pdf]

## Supplementary Appendix

|                                                                                                                                       |   |
|---------------------------------------------------------------------------------------------------------------------------------------|---|
| Table S1. The details of the trial inclusion and exclusion criteria.....                                                              | 2 |
| Table S2. Schedule of visits and assessments.....                                                                                     | 2 |
| Table S3. REEDA outcome among participants.....                                                                                       | 3 |
| Table S4. Pigmentation outcome among participants.....                                                                                | 4 |
| Table S5. Erythema outcome among participants.....                                                                                    | 5 |
| Table S6. Scar area (mm <sup>2</sup> ) outcome among participants.....                                                                | 6 |
| Table S7. Scar volume (mm <sup>3</sup> ) outcome among participants.....                                                              | 7 |
| Table S8. Immunoglobulins (IgG, IgA, IgM) and complements (C3, C4) in milk outcomes<br>among participants.....                        | 8 |
| Figure S1. Mean difference of REEDA between MSCs and placebo group.....                                                               | 3 |
| Figure S2. Mean difference of pigmentation between MSCs and placebo group.....                                                        | 4 |
| Figure S3. Mean difference of Erythema between MSCs and placebo group.....                                                            | 5 |
| Figure S4. Mean difference of Scar Area (mm <sup>2</sup> ) between MSCs and placebo group.....                                        | 6 |
| Figure S5. Mean difference of Scar volume (mm <sup>3</sup> ) between MSCs and placebo group.....                                      | 7 |
| Figure S6. Mean difference of immunoglobulins (IgG, IgA, IgM) and complements (C3, C4)<br>in milk between MSCs and placebo group..... | 9 |

Table S1. The details of the trial inclusion and exclusion criteria

| Inclusion criteria                                                                | Exclusion criteria                                                              |
|-----------------------------------------------------------------------------------|---------------------------------------------------------------------------------|
| Primiparous women receiving elective cesarean delivery                            | Any systemic uncontrolled disease                                               |
| Ages between 21-35 years                                                          | Recent or current cancer                                                        |
| Gestation ages $\geq 37$ weeks and $< 42$ weeks                                   | History or presenting with a keloid formation                                   |
| Willing to give and sign an informed consent form and a photographic release form | Wounds or local disease in treatment area                                       |
| Willing to comply with study dosing and complete the entire course of the study   | Planning any other cosmetic procedure to the study area during the study period |
|                                                                                   | Smoking                                                                         |
|                                                                                   | Gel allergy                                                                     |

Table S2. Schedule of visits and assessments

| Time point (weeks) | 2 | 4 | 12 | 24 |
|--------------------|---|---|----|----|
| VSS                |   | √ | √  | √  |
| REEDA              | √ |   |    |    |
| Erythema           |   | √ | √  | √  |
| Pigmentation       |   | √ | √  | √  |
| Scar area          |   | √ | √  | √  |
| Scar volume        |   | √ | √  | √  |
| Immunoglobulin     |   | √ | √  | √  |
| Satisfaction       |   |   |    | √  |
| Adverse events     | √ | √ | √  | √  |

VSS: Vancouver Scar Scale;

REEDA: Redness, Edema, Ecchymosis, Discharge, Approximation.

Table S3. REEDA outcome among participants.

|                  | All participants | Placebo group | Low-dose group | High-dose group | $F/\chi^2$ | $P$   |
|------------------|------------------|---------------|----------------|-----------------|------------|-------|
|                  | 1.13±0.66        | 1.26±0.76     | 1.19±0.62      | 0.97±0.57       | 1.540      | 0.221 |
| Subgroup         |                  |               |                |                 |            |       |
| Age (year)       |                  |               |                |                 |            |       |
| 21-27            | 1.10±0.74        | 1.33±0.90     | 1.00±0.45      | 0.93±0.70       | 1.259      | 0.295 |
| 28-35            | 1.17±0.58        | 1.17±0.58     | 1.31±0.70      | 1.00±0.39       | 1.085      | 0.348 |
| Gestation (week) |                  |               |                |                 |            |       |
| 37-39            | 1.07±0.58        | 1.17±0.51     | 1.12±0.70      | 0.95±0.52       | 0.728      | 0.488 |
| 40-42            | 1.24±0.79        | 1.44±1.13     | 1.30±0.48      | 1.00±0.67       | 0.787      | 0.466 |

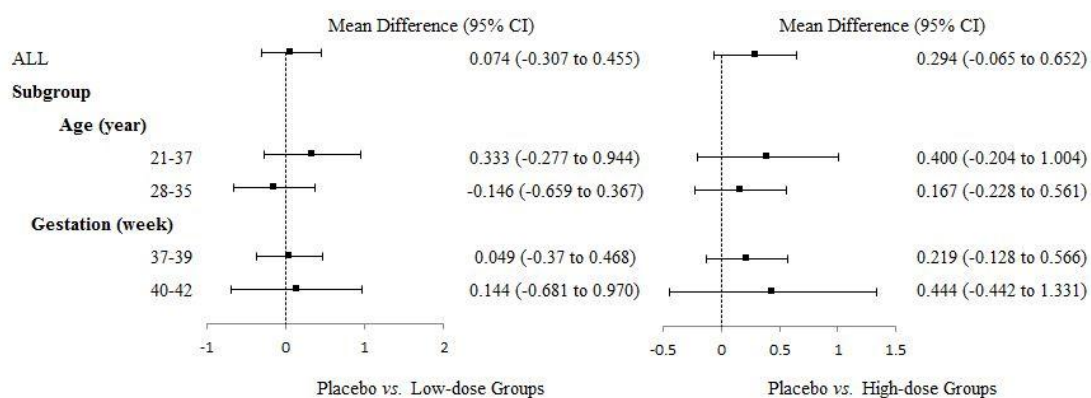

Figure S1. Mean difference of REEDA between MSCs and placebo group.

Table S4. Pigmentation outcome among participants.

|                         | All participants | Placebo group | Low-dose group | High-dose group | $F/\chi^2$ | $P$   |
|-------------------------|------------------|---------------|----------------|-----------------|------------|-------|
| First month             | 256.60±90.62     | 243.25±85.94  | 261.13±88.09   | 265.04±99.96    | 0.374      | 0.690 |
| Third month             | 201.04±65.15     | 196.47±59.25  | 201.53±57.22   | 206.65±86.19    | 0.105      | 0.901 |
| Sixth month             | 202.99±67.16     | 209.76±61.53  | 198.35±69.04   | 199.83±75.03    | 0.183      | 0.833 |
| <b>Subgroup</b>         |                  |               |                |                 |            |       |
| <b>Age(year)</b>        |                  |               |                |                 |            |       |
| 21-27 First month       | 263.95±90.58     | 256.20±98.74  | 281.67±71.33   | 257.89±99.83    | 0.283      | 0.755 |
| Third month             | 213.66±54.84     | 218.04±62.48  | 221.74±51.81   | 190.82±47.47    | 0.658      | 0.527 |
| Sixth month             | 210.56±62.71     | 219.72±53.27  | 202.98±50.31   | 206.24±86.38    | 0.224      | 0.801 |
| 28-35 First month       | 247.65±91.29     | 218.96±51.78  | 244.99±98.86   | 274.33±104.74   | 0.818      | 0.451 |
| Third month             | 190.00±72.03     | 172.74±47.65  | 184.44±57.85   | 217.21±106.20   | 0.966      | 0.393 |
| Sixth month             | 194.37±72.03     | 196.81±71.71  | 194.49±83.63   | 190.67±60.45    | 0.014      | 0.986 |
| <b>Gestation (week)</b> |                  |               |                |                 |            |       |
| 37-39 First month       | 248.52±90.51     | 251.82±97.15  | 237.75±77.03   | 256.30±101.17   | 0.162      | 0.851 |
| Third month             | 193.00±63.02     | 207.33±61.66  | 182.39±54.03   | 188.66±75.58    | 0.576      | 0.567 |
| Sixth month             | 203.19±68.87     | 219.50±59.25  | 189.39±75.15   | 199.76±72.98    | 0.711      | 0.497 |
| 40-42 First month       | 270.59±90.85     | 223.66±53.34  | 296.20±95.83   | 278.62±102.51   | 1.412      | 0.264 |
| Third month             | 217.13±67.97     | 174.74±51.38  | 228.34±52.73   | 278.63±104.28   | 3.419      | 0.057 |
| Sixth month             | 202.49±64.72     | 191.49±65.53  | 214.04±58.06   | 200.30±124.59   | 0.222      | 0.804 |

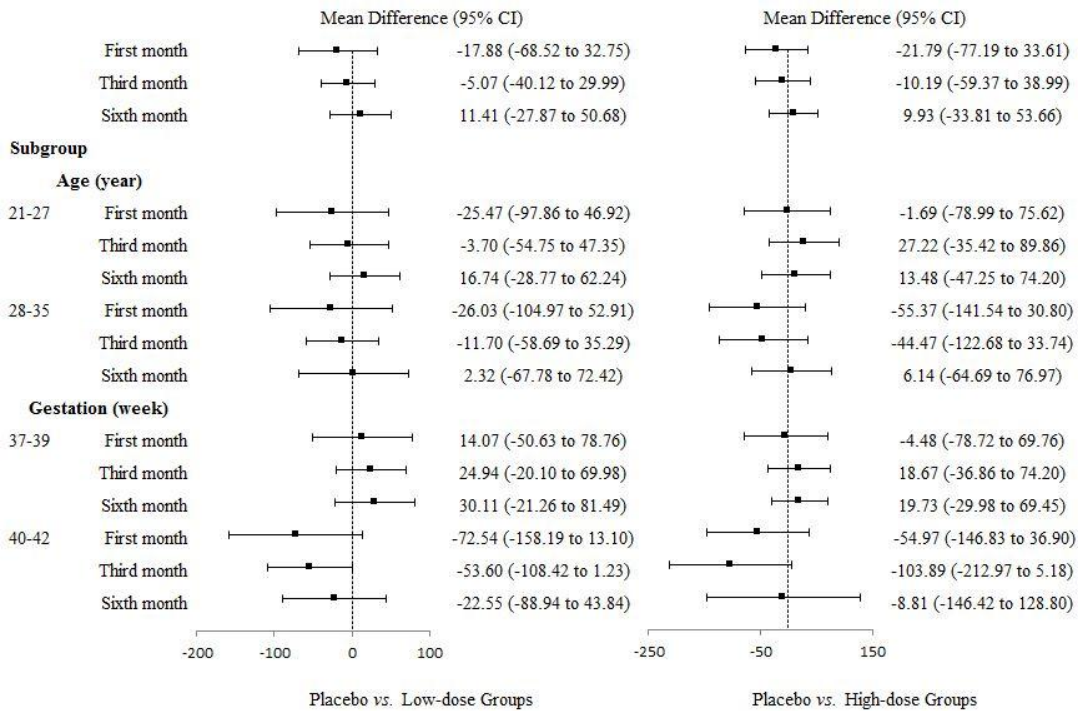

Figure S2. Mean difference of pigmentation between MSCs and placebo group.

Table S5. Erythema outcome among participants.

|                         | All participants | Placebo group  | Low-dose group | High-dose group | $F/\chi^2$ | $P$   |
|-------------------------|------------------|----------------|----------------|-----------------|------------|-------|
| First month             | 356.53 ±73.98    | 366.68 ±54.46  | 346.02 ±62.16  | 357.79 ±100.00  | 0.465      | 0.630 |
| Third month             | 324.38 ±48.93    | 312.87 ±48.57  | 338.86 ±51.75  | 317.31 ±41.36   | 1.839      | 0.168 |
| Sixth month             | 313.30 ±73.87    | 329.98 ±81.58  | 321.59 ±61.81  | 280.00 ±70.45   | 2.579      | 0.084 |
| <b>Subgroup</b>         |                  |                |                |                 |            |       |
| <b>Age(year)</b>        |                  |                |                |                 |            |       |
| 21-27 First month       | 356.60 ±73.98    | 364.27 ±53.99  | 351.59 ±72.46  | 351.99 ±97.15   | 0.125      | 0.883 |
| Third month             | 335.29 ±47.97    | 321.23 ±48.88  | 353.09 ±48.95  | 328.45 ±40.82   | 1.322      | 0.285 |
| Sixth month             | 325.24 ±81.16    | 353.77 ±80.45  | 327.87 ±61.88  | 285.52 ±89.59   | 2.150      | 0.134 |
| 28-35 First month       | 356.44 ±75.16    | 371.21 ±58.77  | 341.65 ±55.20  | 365.34 ±108.39  | 0.479      | 0.624 |
| Third month             | 314.83 ±48.49    | 303.68 ±49.07  | 326.82 ±52.85  | 309.89 ±42.39   | 0.695      | 0.507 |
| Sixth month             | 299.71 ±63.24    | 299.05 ±75.89  | 316.36 ±63.99  | 272.11 ±32.75   | 1.090      | 0.351 |
| <b>Gestation (week)</b> |                  |                |                |                 |            |       |
| 37-39 First month       | 355.92 ±68.31    | 376.51 ±53.35  | 350.49 ±72.20  | 338.19 ±77.49   | 1.260      | 0.294 |
| Third month             | 323.10 ±48.50    | 322.44 ±43.38  | 336.72 ±58.25  | 307.98 ±40.24   | 1.146      | 0.329 |
| Sixth month             | 306.30 ±65.41    | 315.22 ±55.29  | 320.91 ±73.86  | 283.75 ±64.63   | 1.406      | 0.257 |
| 40-42 First month       | 357.59 ±84.32    | 344.23 ±53.97  | 339.32 ±45.95  | 388.28 ±126.59  | 0.912      | 0.416 |
| Third month             | 326.94 ±50.96    | 293.74 ±56.07  | 341.86 ±43.87  | 354.67 ±21.22   | 2.807      | 0.088 |
| Sixth month             | 330.40 ±91.21    | 357.65 ±116.02 | 322.79 ±36.46  | 251.85 ±138.38  | 1.146      | 0.344 |

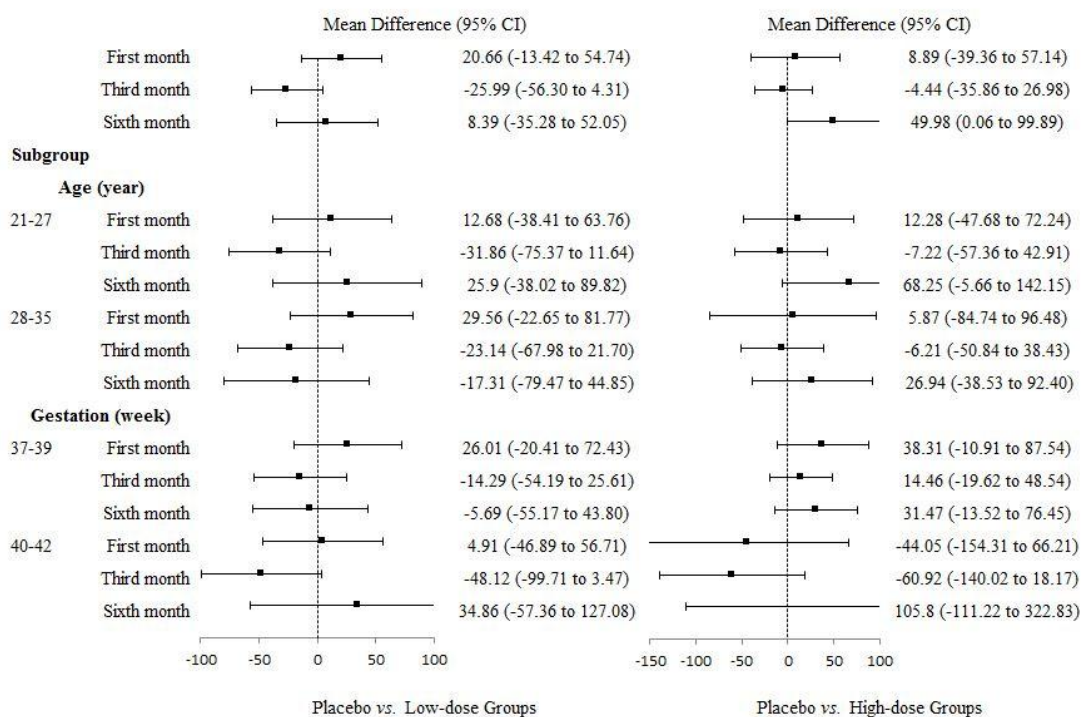

Figure S3. Mean difference of Erythema between MSCs and placebo group.

Table S6. Scar area (mm<sup>2</sup>) outcome among participants.

|                                   | All participants | Placebo group | Low-dose group | High-dose group | F/ $\chi^2$ | P     |
|-----------------------------------|------------------|---------------|----------------|-----------------|-------------|-------|
| <b>Scar Area (mm<sup>2</sup>)</b> |                  |               |                |                 |             |       |
| First month                       | 292.70±87.17     | 277.42±75.68  | 306.69±79.02   | 291.49±105.60   | 0.669       | 0.516 |
| Third month                       | 319.65±60.02     | 317.40±58.13  | 312.34±57.61   | 334.33±67.52    | 0.632       | 0.535 |
| Sixth month                       | 378.01±113.20    | 385.49±110.97 | 386.27±119.37  | 357.20±112.19   | 0.388       | 0.680 |
| <b>Subgroup</b>                   |                  |               |                |                 |             |       |
| <b>Age(year)</b>                  |                  |               |                |                 |             |       |
| 21-27 First month                 | 299.33±100.02    | 288.22±78.69  | 326.21±108.93  | 289.30±114.34   | 0.541       | 0.587 |
| Third month                       | 315.69±63.07     | 332.59±51.96  | 313.04±73.25   | 292.38±62.06    | 0.764       | 0.477 |
| Sixth month                       | 365.39±135.08    | 414.49±134.98 | 327.55±132.45  | 339.41±131.22   | 1.479       | 0.244 |
| 28-35 First month                 | 284.62±69.09     | 258.52±71.00  | 292.37±46.41   | 294.88±96.95    | 0.753       | 0.480 |
| Third month                       | 322.99±58.13     | 302.22±62.61  | 311.75±43.45   | 362.29±58.06    | 3.391       | 0.047 |
| Sixth month                       | 392.37±81.63     | 347.80±54.88  | 435.21±84.29   | 382.61±80.36    | 3.842       | 0.035 |
| <b>Gestation (week)</b>           |                  |               |                |                 |             |       |
| 37-39 First month                 | 297.61±84.30     | 283.45±64.93  | 298.26±64.87   | 313.06±119.90   | 0.450       | 0.641 |
| Third month                       | 316.67±59.41     | 325.30±58.94  | 301.14±58.87   | 325.46±61.88    | 0.736       | 0.486 |
| Sixth month                       | 369.35±105.20    | 375.22±103.54 | 377.53±104.29  | 355.86±113.47   | 0.182       | 0.834 |
| 40-42 First month                 | 283.65±93.32     | 261.35±104.80 | 320.18±100.00  | 257.93±72.27    | 1.313       | 0.289 |
| Third month                       | 325.44±62.33     | 302.74±58.03  | 328.03±54.82   | 369.80±92.18    | 1.267       | 0.307 |
| Sixth month                       | 399.17±131.60    | 404.75±128.87 | 401.58±148.77  | 367.23±144.63   | 0.060       | 0.942 |

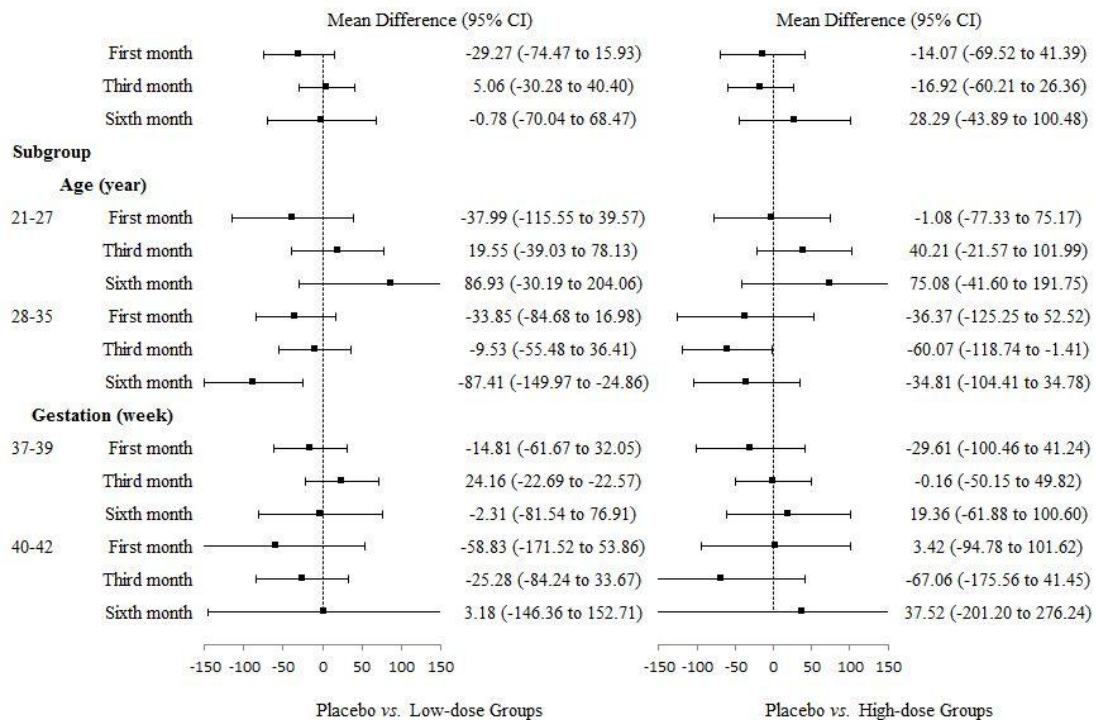

Figure S4. Mean difference of Scar Area (mm<sup>2</sup>) between MSCs and placebo group.

Table S7. Scar volume (mm<sup>3</sup>) outcome among participants.

|                         | All participants | Placebo group | Low-dose group | High-dose group | F/ $\chi^2$ | P     |
|-------------------------|------------------|---------------|----------------|-----------------|-------------|-------|
| First month             | 694.18±316.69    | 663.26±286.55 | 742.97±302.38  | 668.59±363.85   | 0.481       | 0.620 |
| Third month             | 699.91±233.29    | 712.92±223.20 | 667.50±235.50  | 734.40±251.83   | 0.418       | 0.660 |
| Sixth month             | 837.84±407.10    | 876.02±390.03 | 895.92±441.52  | 711.02±378.14   | 1.156       | 0.322 |
| <b>Subgroup</b>         |                  |               |                |                 |             |       |
| <b>Age(year)</b>        |                  |               |                |                 |             |       |
| 21-27 First month       | 742.51±374.98    | 710.62±334.04 | 853.55±421.97  | 687.15±384.23   | 0.674       | 0.516 |
| Third month             | 690.98±241.12    | 784.93±198.67 | 632.30±268.45  | 641.96±242.95   | 1.230       | 0.310 |
| Sixth month             | 798.30±417.17    | 976.13±452.33 | 676.57±419.14  | 688.83±307.94   | 2.083       | 0.142 |
| 28-35 First month       | 635.27±218.16    | 280.38±163.63 | 661.88±139.40  | 639.72±350.17   | 0.351       | 0.707 |
| Third month             | 707.44±230.07    | 640.91±232.76 | 697.29±210.11  | 796.03±251.81   | 1.105       | 0.345 |
| Sixth month             | 882.84±397.77    | 745.88±256.44 | 1078.70±385.00 | 742.71±486.91   | 2.801       | 0.079 |
| <b>Gestation (week)</b> |                  |               |                |                 |             |       |
| 37-39 First month       | 714.42±311.94    | 672.89±246.91 | 714.26±264.40  | 762.07±425.73   | 0.296       | 0.746 |
| Third month             | 708.75±238.30    | 739.93±247.20 | 639.37±218.78  | 755.91±251.46   | 0.937       | 0.401 |
| Sixth month             | 819.04±384.89    | 888.73±368.60 | 858.36±401.69  | 712.66±387.85   | 0.887       | 0.420 |
| 40-42 First month       | 656.92±328.41    | 637.58±401.09 | 788.91±365.58  | 523.16±174.54   | 1.649       | 0.215 |
| Third month             | 682.66±228.23    | 662.78±176.16 | 706.89±263.90  | 648.30±286.81   | 0.106       | 0.900 |
| Sixth month             | 883.79±465.65    | 852.20±453.20 | 961.64±526.69  | 698.74±426.10   | 0.263       | 0.772 |

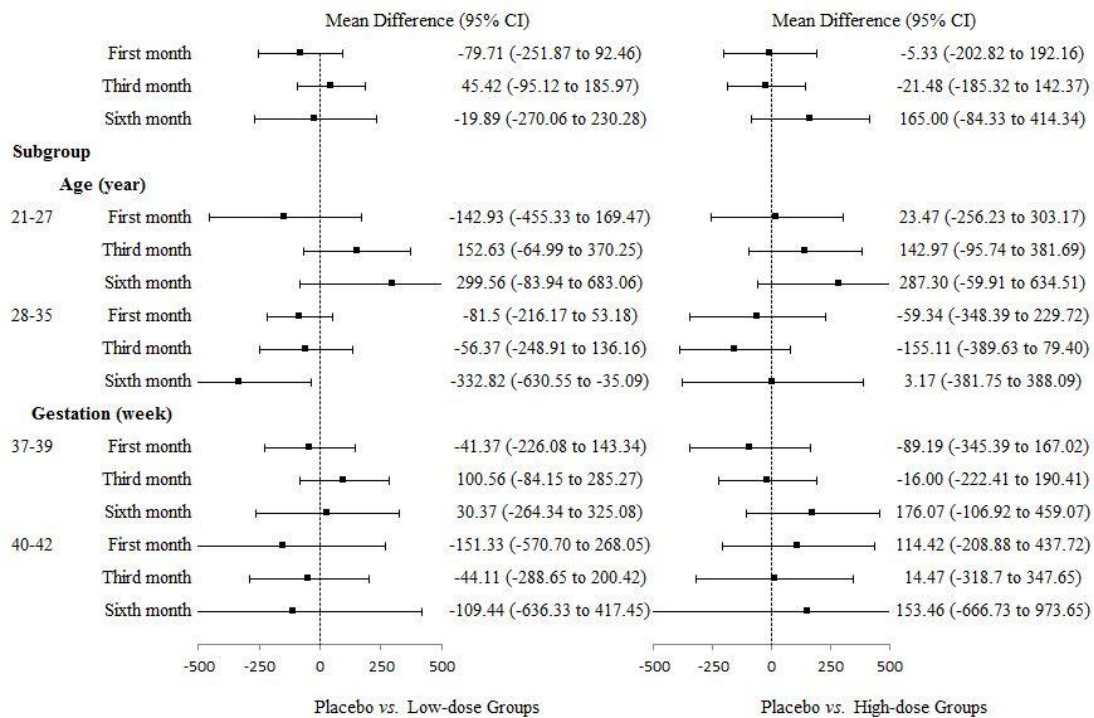

Figure S5. Mean difference of Scar volume (mm<sup>3</sup>) between MSCs and placebo group.

Table S8. Immunoglobulins (IgG, IgA, IgM) and complements (C3, C4) in milk outcomes among participants.

|                    | All participants | Placebo group | Low-dose group | High-dose group | $F/\chi^2$ | $P$   |
|--------------------|------------------|---------------|----------------|-----------------|------------|-------|
| <b>Third day</b>   |                  |               |                |                 |            |       |
| IgG                | 0.42±0.18        | 0.39±0.17     | 0.41±0.12      | 0.44±0.22       | 0.535      | 0.588 |
| IgA                | 3.73±1.20        | 3.47±1.54     | 3.92±0.87      | 3.82±1.09       | 1.091      | 0.341 |
| IgM                | 0.94±0.25        | 0.93±0.37     | 0.93±0.14      | 0.96±0.19       | 0.067      | 0.936 |
| C3                 | 0.68±0.25        | 0.67±0.29     | 0.65±0.21      | 0.70±0.26       | 0.208      | 0.813 |
| C4                 | 0.54±0.21        | 0.56±0.31     | 0.55±0.12      | 0.52±0.13       | 0.230      | 0.795 |
| <b>First month</b> |                  |               |                |                 |            |       |
| IgG                | 0.54±0.80        | 0.37±0.07     | 0.77±1.31      | 0.44±0.14       | 1.554      | 0.220 |
| IgA                | 3.72±1.09        | 3.65±0.78     | 3.52±1.02      | 3.99±1.35       | 1.137      | 0.328 |
| IgM                | 0.97±0.20        | 0.97±0.19     | 0.93±0.17      | 1.02±0.24       | 1.055      | 0.354 |
| C3                 | 0.64±0.16        | 0.64±0.11     | 0.58±0.11      | 0.69±0.22       | 2.796      | 0.069 |
| C4                 | 0.54±0.13        | 0.53±0.09     | 0.52±0.06      | 0.57±0.19       | 1.058      | 0.354 |
| <b>Third month</b> |                  |               |                |                 |            |       |
| IgG                | 0.71±0.94        | 1.17±1.39     | 0.48±0.47      | 0.51±0.60       | 2.913      | 0.065 |
| IgA                | 3.34±1.20        | 2.93±1.48     | 3.53±0.76      | 3.55±1.36       | 1.323      | 0.277 |
| IgM                | 0.98±0.17        | 1.02±0.10     | 0.97±0.14      | 0.97±0.26       | 0.315      | 0.732 |
| C3                 | 0.58±0.17        | 0.56±0.10     | 0.54±0.07      | 0.67±0.29       | 2.362      | 0.106 |
| C4                 | 0.49±0.10        | 0.50±0.09     | 0.46±0.06      | 0.54±0.14       | 2.860      | 0.068 |
| <b>Sixth month</b> |                  |               |                |                 |            |       |
| IgG                | 0.49±0.75        | 0.32±0.06     | 0.31±0.09      | 2.04±2.28       | 8.48       | 0.003 |
| IgA                | 3.10±0.93        | 3.37±0.90     | 3.03±0.65      | 2.20±2.00       | 1.429      | 0.267 |
| IgM                | 0.88±0.17        | 0.89±0.13     | 0.90±0.14      | 0.82±0.47       | 0.177      | 0.840 |
| C3                 | 0.56±0.18        | 0.53±0.16     | 0.54±0.12      | 1.04±           | 6.428      | 0.009 |
| C4                 | 2.87±10.45       | 5.51±15.18    | 0.47±0.05      | 0.66±           | 0.519      | 0.605 |



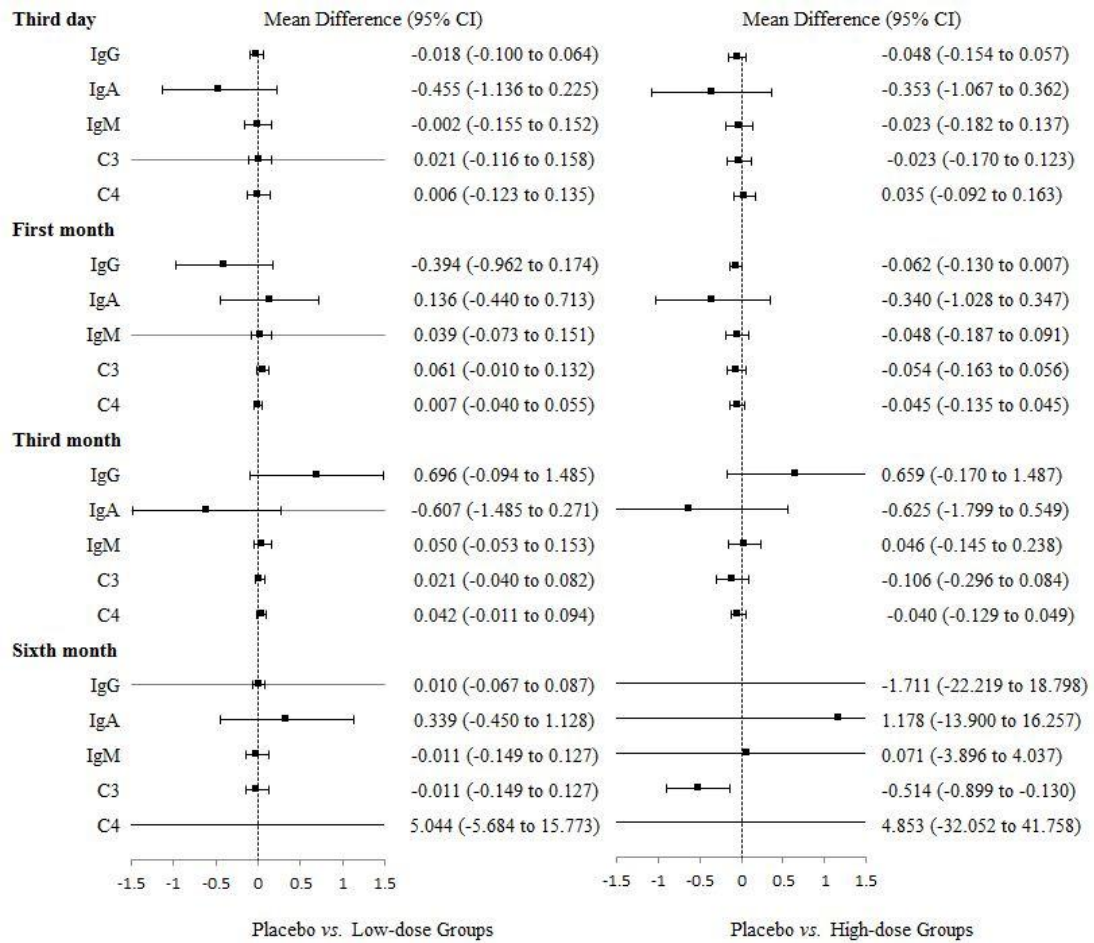

Figure S6. Mean difference of immunoglobulins (IgG, IgA, IgM) and complements (C3, C4) in milk between MSCs and placebo group.
